# Supplementary material for: Behavioral traits that define social dominance are the same that reduce social influence in a consensus task
Source: PubMed Central journal article supplement — Proc Natl Acad Sci U S A. 2020 Jul 16;117(31):18566–73. doi: 10.1073/pnas.2000158117 (PMC7414064; doi:10.1073/pnas.2000158117), 2020-07-16
Supplement: pnas.2000158117.sapp.pdf [file pnas.2000158117.sapp.pdf]

## Supplementary Information Appendix for

### **Behavioral traits that define social dominance are the same that reduce social influence in a consensus task**

Mariana Rodriguez-Santiago<sup>1,2†</sup>, Paul Nührenberg<sup>3,4†</sup>, James Derry<sup>1</sup>, Oliver Deussen<sup>4</sup>, Linda K Garrison<sup>1</sup>, Sylvia F Garza<sup>1,3,4</sup>, Fritz A Francisco<sup>3,4</sup>, Hans A Hofmann<sup>1,2\*</sup>, Alex Jordan<sup>1,3,4\*</sup>

#### Affiliations:

1. Department of Integrative Biology, The University of Texas at Austin
2. Institute for Neuroscience, The University of Texas at Austin
3. Department of Collective Behavior, Max Planck Institute of Animal Behavior, Konstanz
4. Centre for the Advanced Study of Collective Behavior, University of Konstanz

† Denotes co-first authorship

\*Authors for correspondence: [ajordan@ab.mpg.de](mailto:ajordan@ab.mpg.de); [hans@utexas.edu](mailto:hans@utexas.edu)

<https://orcid.org/0000-0001-6131-9734>

#### **Classification**

BIOLOGICAL SCIENCES; Ecology

#### **Keywords**

Social; dominance; influence; fish; group; consensus

#### **Author Contributions**

AJ, JD, and HAH designed experiments; AJ and JD wrote code for automated data acquisition; AJ, MRS, LKG and SFG performed experiments; AJ and SFG performed image-based tracking; PN performed computer vision tracking; PN, AJ, LKG, FAF, and MRS performed statistical analysis; AJ, PN, and MRS wrote the manuscript; AJ, LKG, HAH, and OD revised manuscript.

#### **This file includes:**

Supplementary Video 1; Supplementary Figures 1 to 5

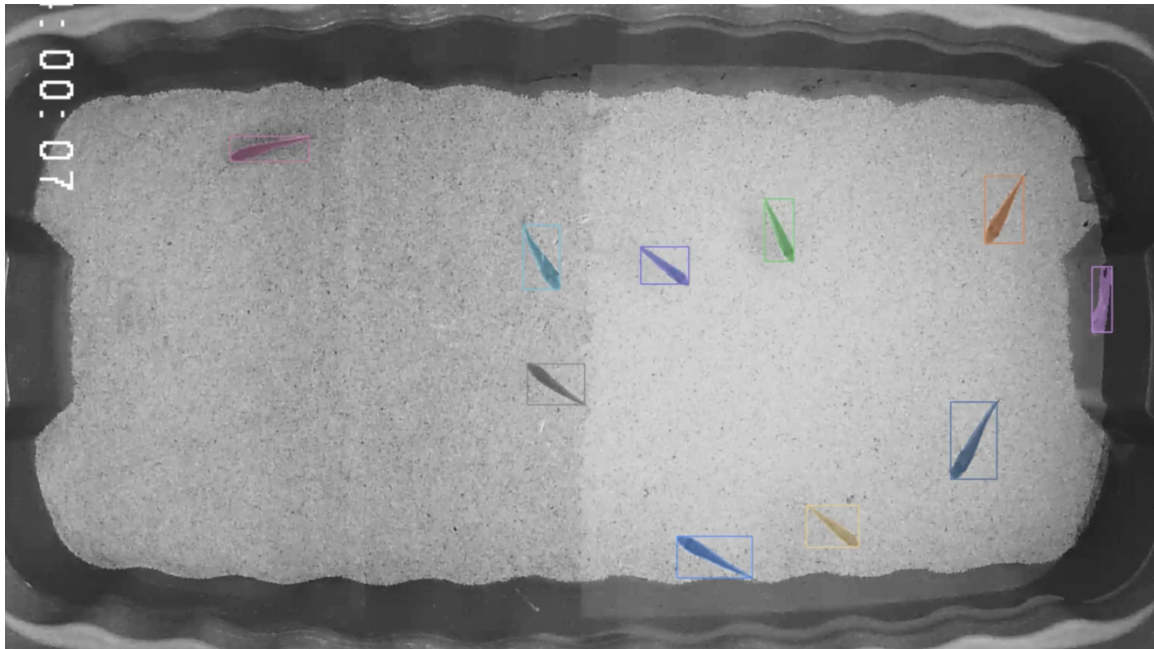

**Supplementary Video 1.** A still frame from supplementary video showing the sequence of our tracking and behavioral analyses. The first sequence shows raw video input, of which a subset of frames was annotated as the training set. After training the neural network with these annotations, fish in the video were then able to be automatically segmented with Mask R-CNN; this segmentation is here represented with a colored mask and corresponding bounding-box applied to each successfully detected fish in each frame of the video (second sequence). Identities of each fish were maintained in subsequent frames using a nearest neighbor linking approach. The third sequence displays the trajectories and estimated spine positions of each individual. A simplified model (colored 'fish') was then overlaid on actual positions of fish to compute visual field connectivity using a ray-casting approach, considering the visual fields of each eye of a focal individual (fourth sequence, gray-shaded areas) and occlusions (black-shaded areas).

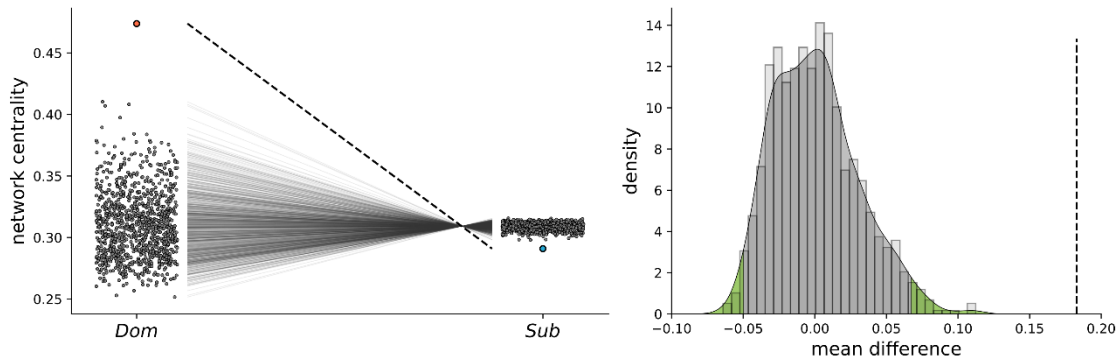

**Supplementary Figure 1. Network randomization test for network centrality.** **left)** Repeated node randomization ( $n = 1000$ ) of the networks resulted in mean values (gray dots) for both dominant (*Dom*) and subordinate (*Sub*) network centrality (see Figure 1b for the observed distributions). For each randomization, a mean difference was calculated between *Dom* and *Sub* mean values, represented with the thin, gray lines. The observed difference is represented with the thick, dashed line. **right)** The distribution of mean differences (histogram and kernel density estimate) that resulted from node randomizations was used as the null distribution to calculate a two-tailed  $p$ -value for the observed difference (dashed line), yielding a value of  $p < .001$  for the difference between *Dom* and *Sub* network centrality. The green areas represent mean differences that are as or more extreme than the .025 or .975 quantiles of the null distribution for a two-tailed test with a significance level of  $\alpha = .05$ . As the  $p$ -value for the observed difference is smaller than this significance level, the difference is evaluated to be statistically significant.

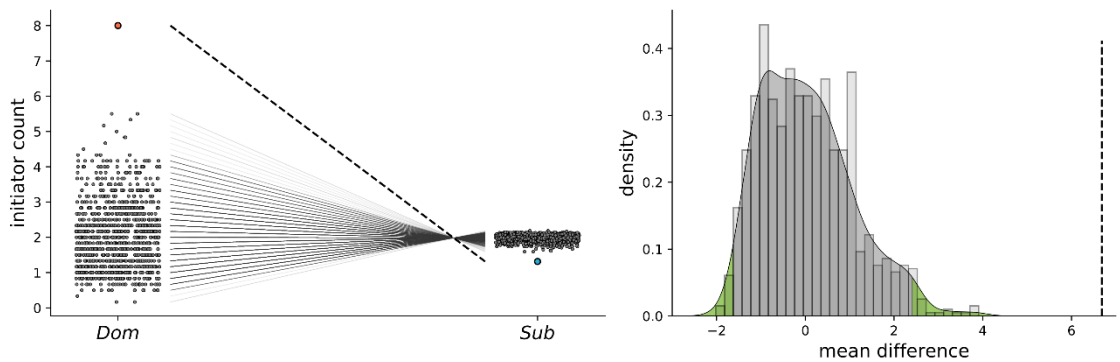

**Supplementary Figure 2. Network randomization test for initiator count.** A  $p$ -value ( $< .001$ ) was obtained for the observed difference of dominant (*Dom*) and subordinate (*Sub*) event initiator counts using a network randomization test analogously to Supplementary Figure 1 (see also Figure 1c).

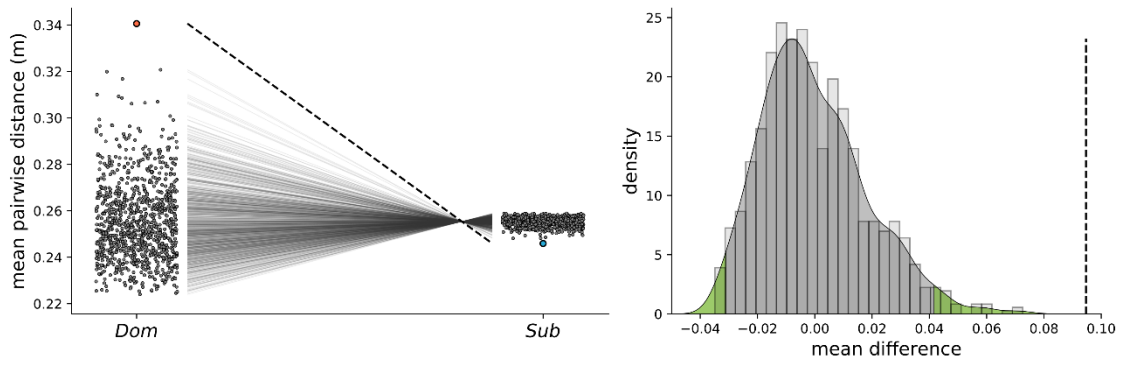

**Supplementary Figure 3. Network randomization test for mean pairwise distance.** A  $p$ -value ( $< .001$ ) was obtained for the observed difference of dominant (*Dom*) and subordinate (*Sub*) mean pairwise distance using a network randomization test analogously to Supplementary Figure 1 (see also Figure 3b).

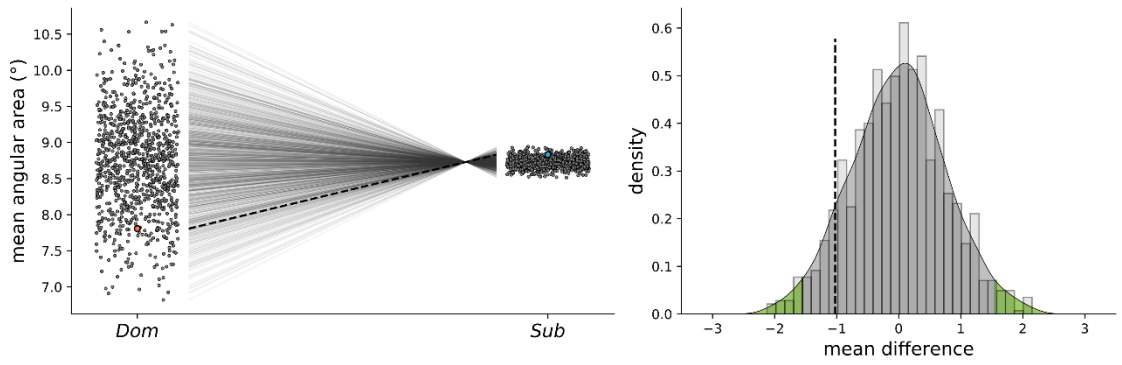

**Supplementary Figure 4. Network randomization test for mean angular area.** A  $p$ -value ( $= .196$ ) was obtained for the observed difference of dominant (*Dom*) and subordinate (*Sub*) mean angular area using a network randomization test analogously to Supplementary Figure 1 (see also Figure 3c).

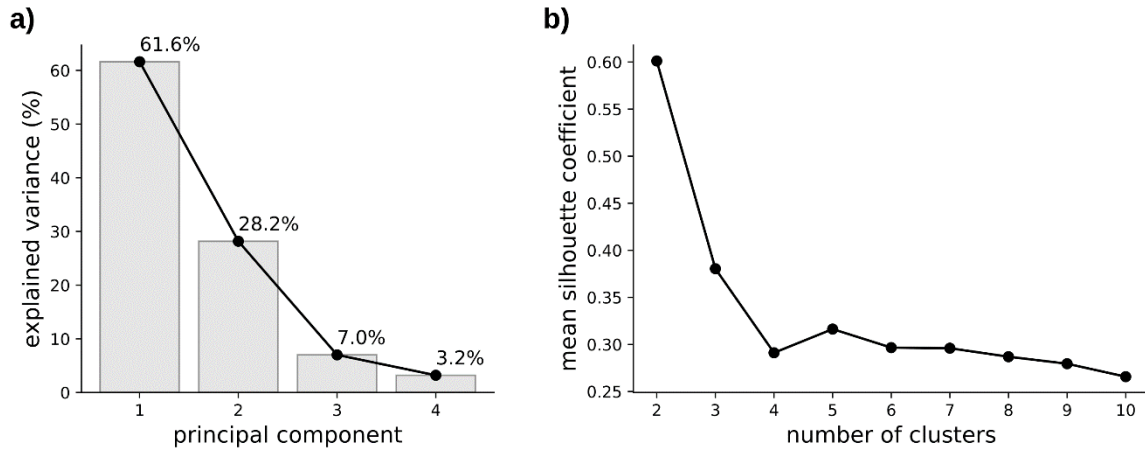

**Supplementary Figure 5. PCA and clustering.** **a)** Percentage of explained variance for each of the four principal components. **b)** A silhouette analysis was performed to determine the appropriate number of clusters (between 2 to 10) for *k*-means clustering. For each number of clusters (*k*), the mean silhouette coefficient was calculated. These values are ranged in the interval [-1, 1], a coefficient close to 1 indicates good cluster separation, 0 overlapping clusters and negative values wrong cluster assignments. Hence, *k* = 2 clearly results in the best separation of clusters. For visualization, see Figure 3e. The two clusters that were obtained through *k*-means clustering are identical to the categories of social status (dominant and subordinate) that we defined based on the phenotypic indicators of dominance (color of dominant male individuals).
